# Supplementary material
Source: PubMed Central journal article supplement (PMC7269891)
Supplement: 12038_2020_46_MOESM3_ESM.pdf [file 12038_2020_46_MOESM3_ESM.pdf]

# dBDEMC2 database

## Differential Expression Profile in cancer vs normal

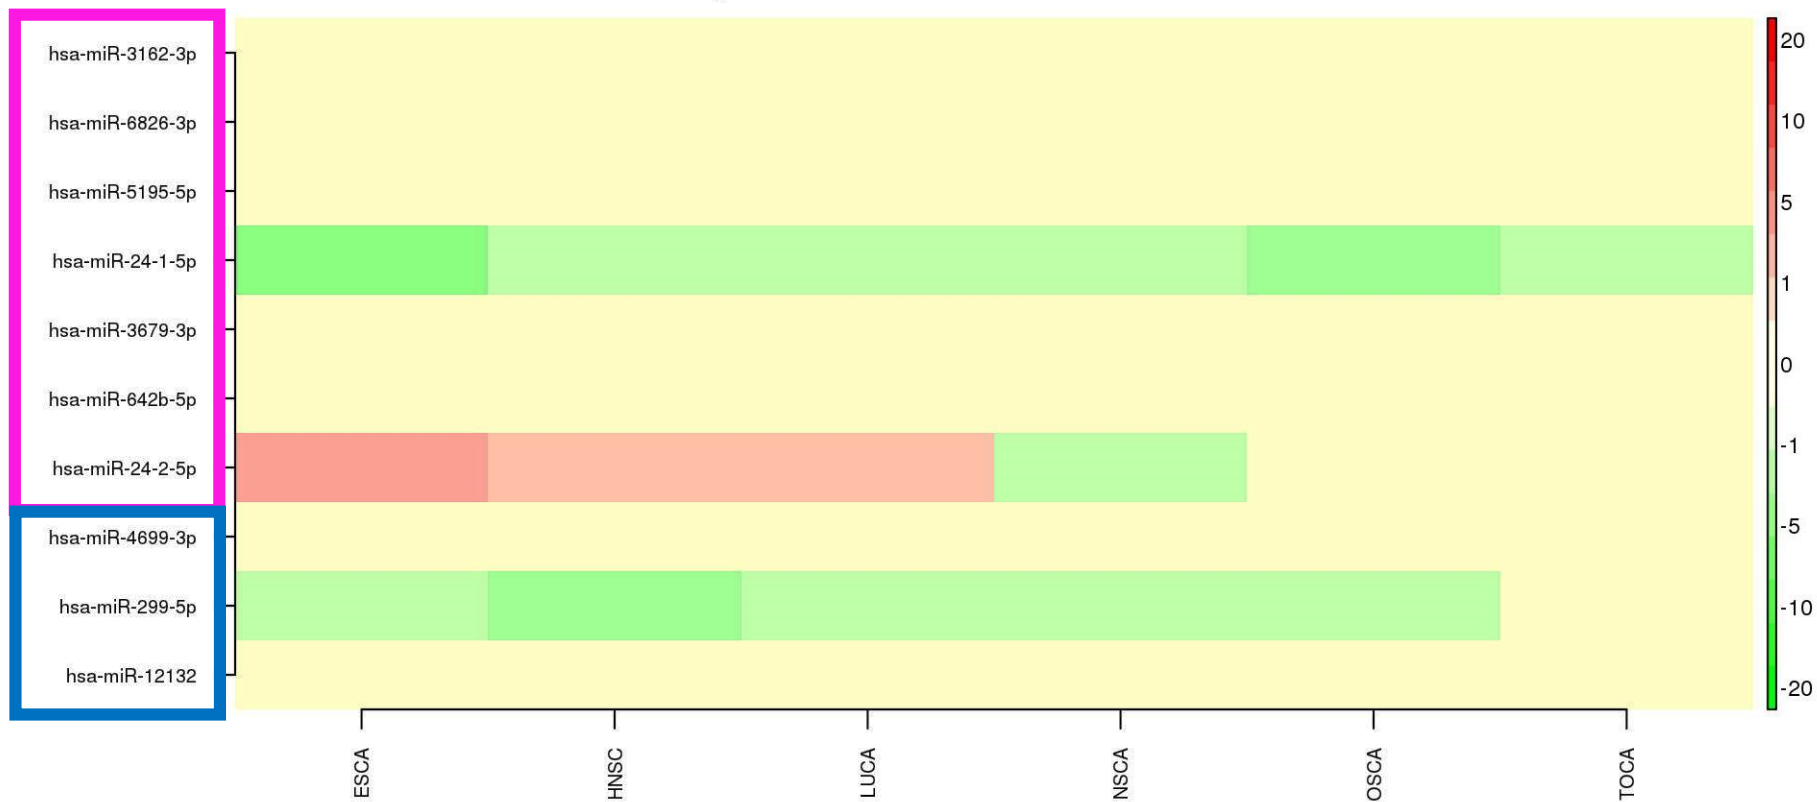

ESCA=Esophageal Cancer  
HNSC=Head and neck cancer  
LUCA=Lung cancer

NSCA=Nasopharyngeal cancer  
OSCA=Oral squamous cell carcinoma  
TOCA=Tonsil cancer

### Differential expression of miRNAs targeting the Coronavirus 28881-3 GGG/AAAC site.

Each row represents the expression profile of mentioned miRNA in respective cancer conditions described. Green represents downregulation and red represents upregulation of miRNA in cancer condition. The miRNAs in magenta box target the GGG site and the ones in Blue box target the AAC site

## miRNA expression in saliva TissueAtlas database

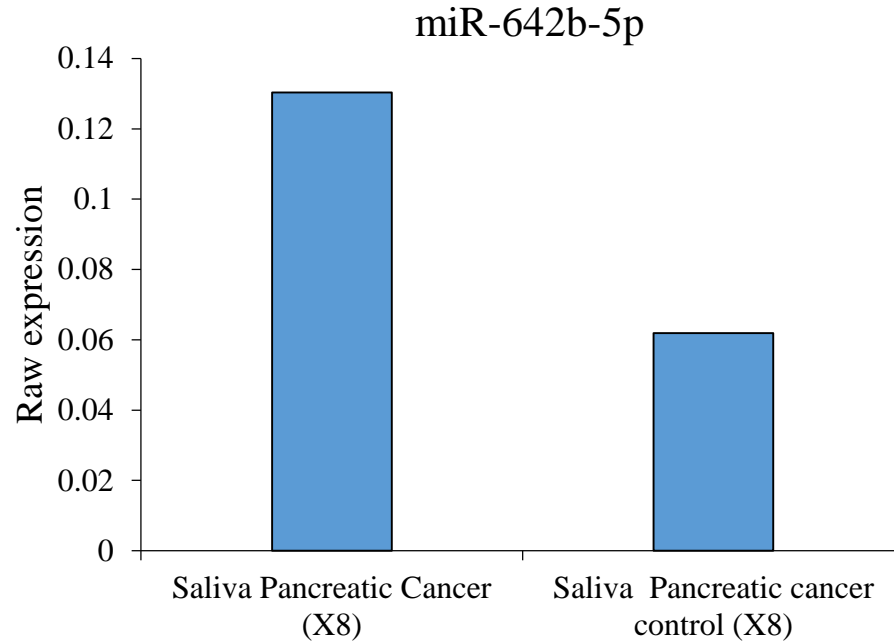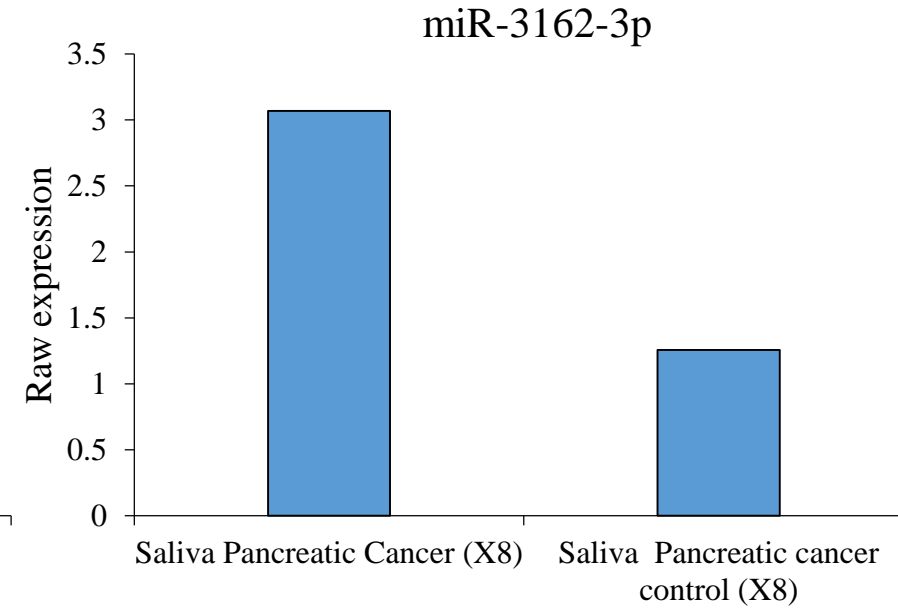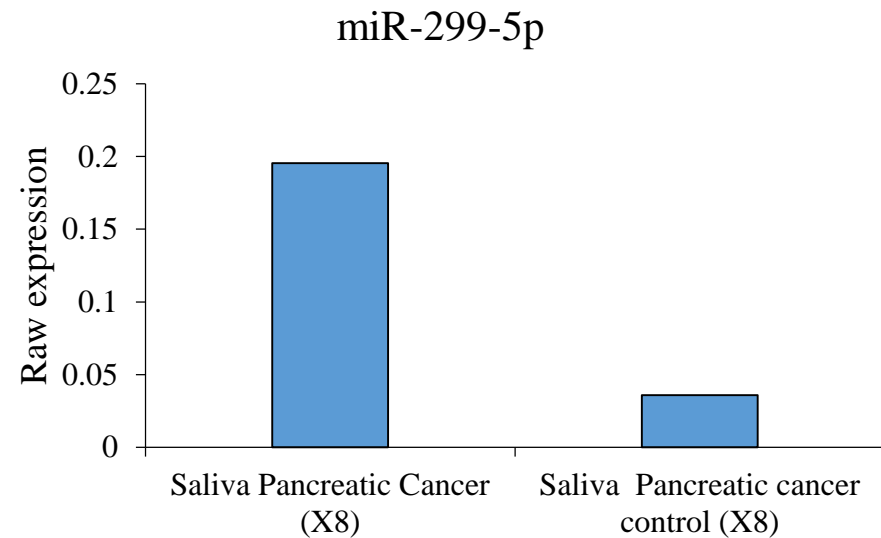

**Differential expression of miRNAs targeting the Coronavirus 28881-3 GGG/AAAC site in saliva of Pancreatic cancer patients.** The graphs represent raw expression values of miRNA whose expression is altered in the saliva of pancreatic cancer patients as compared to control samples. The numbers in the bracket describes the number of samples taken for analysis.
